# Supplementary material for: Food Sources of Energy and Nutrients among Children in the United States: National Health and Nutrition Examination Survey 2003–2006
Source: Nutrients. 2013 Jan 22;5(1):283–301. doi: 10.3390/nu5010283 (PMC3571649; doi:10.3390/nu5010283)
Supplement: Supplementary File 1 — Supplemental Tables (PDF, 223 KB) [file nutrients-05-00283-s001.pdf]

## Supplemental Tables

**Table S1.** Food/food group sources of monounsaturated fatty acids among US children aged 2 to 18 years (from NHANES 2003–2006).

**Table S2.** Food/food group sources of polyunsaturated fatty acids among US children aged 2 to 18 years (from NHANES 2003–2006).

**Table S3.** Food/food group sources of vitamin A (retinoic acid equivalents [RAE]) among US children aged 2 to 18 years (from NHANES 2003–2006).

**Table S4.** Food/food group sources of vitamin E (alpha-tocopherol [AT]) among US children aged 2 to 18 years (from NHANES 2003–2006).

**Table S5.** Food/food group sources of vitamin C among US children aged 2 to 18 years (from NHANES 2003–2006).

**Table S6.** Food/food group sources of thiamin among US children aged 2 to 18 years (from NHANES 2003–2006).

**Table S7.** Food/Food group sources of riboflavin among US children aged 2 to 18 years (from NHANES 2003–2006).

**Table S8.** Food/Food group sources of niacin among US children aged 2 to 18 years (from NHANES 2003–2006).

**Table S9.** Food/Food group sources of vitamin B6 among US children aged 2 to 18 years (from NHANES 2003–2006).

**Table S10.** Food/Food group sources of folate among US children aged 2 to 18 years (from NHANES 2003–2006).

**Table S11.** Food/food group sources of folate (dietary folate equivalents; DFE) among US children aged 2 to 18 years (from NHANES 2003–2006).

**Table S12.** Food/Food group sources of vitamin B12 among US children aged 2 to 18 years (from NHANES 2003–2006).

**Table S13.** Food/Food group sources of phosphorus among US children aged 2 to 18 years (from NHANES 2003–2006).

**Table S14.** Food/Food group sources of magnesium among US children aged 2 to 18 years (from NHANES 2003–2006).

**Table S15.** Food/Food group sources of iron among US children aged 2 to 18 years (from NHANES 2003–2006).

**Table S16.** Food/Food group sources of zinc among US children aged 2 to 18 years (from NHANES 2003–2006).

**Table S1.** Food/food group sources of monounsaturated fatty acids among US children aged 2 to 18 years (from NHANES 2003–2006) <sup>a</sup>.

| Food/Food Group <sup>b</sup>              | Monounsaturated Fatty Acids (mean = 28.4 g) |         |              |
|-------------------------------------------|---------------------------------------------|---------|--------------|
|                                           | Ranking                                     | % Total | Cumulative % |
| Cake, cookies, quick bread, pastry, pie   | 1                                           | 9.2     | 9.2          |
| Frankfurters, sausages, luncheon meats    | 2                                           | 8.7     | 17.9         |
| Other fats and oils                       | 3                                           | 8.5     | 26.4         |
| Beef                                      | 4                                           | 7.4     | 33.8         |
| Crackers, popcorn, pretzels, chips        | 5                                           | 7.3     | 41.1         |
| Cheese                                    | 6                                           | 7.1     | 48.2         |
| Poultry                                   | 7                                           | 6.9     | 55.1         |
| Milk                                      | 8                                           | 5.6     | 60.7         |
| Potatoes (white)                          | 9                                           | 5.3     | 66.0         |
| Margarine and butter                      | 10                                          | 4.5     | 70.5         |
| Nuts, seeds (including butters, pastes)   | 11                                          | 3.8     | 74.3         |
| Salad dressings, mayonnaise               | 12                                          | 3.6     | 77.9         |
| Biscuits, corn bread, pancakes, tortillas | 13                                          | 3.6     | 81.5         |
| Mixtures, mostly grain                    | 14                                          | 2.8     | 84.3         |
| Pork, ham, bacon                          | 15                                          | 2.6     | 86.9         |
| Milk desserts                             | 16                                          | 2.6     | 89.5         |
| Candy, sugars and sugary foods            | 17                                          | 2.0     | 91.5         |

<sup>a</sup> Data are for children aged 2 to 18 years ( $n = 7332$ ), Day 1 intakes; <sup>b</sup> Food groups ( $n = 2$ ) contributing at least 1% in descending order: yeast breads and rolls and eggs.

**Table S2.** Food/food group sources of polyunsaturated fatty acids among US children aged 2 to 18 years (from NHANES 2003–2006) <sup>a</sup>.

| Food/Food Group <sup>b</sup>              | Polyunsaturated Fatty Acids (mean = 15.1 g) |         |              |
|-------------------------------------------|---------------------------------------------|---------|--------------|
|                                           | Ranking                                     | % Total | Cumulative % |
| Crackers, popcorn, pretzels, chips        | 1                                           | 15.9    | 15.9         |
| Salad dressings, mayonnaise               | 2                                           | 12.3    | 28.2         |
| Other fats and oils                       | 3                                           | 10.5    | 38.7         |
| Cake, cookies, quick bread, pastry, pie   | 4                                           | 8.2     | 46.9         |
| Poultry                                   | 5                                           | 8.0     | 54.9         |
| Margarine and butter                      | 6                                           | 5.3     | 60.2         |
| Nuts, seeds (including butters, pastes)   | 7                                           | 5.3     | 65.5         |
| Yeast breads and rolls                    | 8                                           | 5.0     | 70.5         |
| Biscuits, corn bread, pancakes, tortillas | 9                                           | 3.7     | 74.2         |
| Frankfurters, sausages, luncheon meats    | 10                                          | 3.6     | 77.8         |
| Potatoes (white)                          | 11                                          | 3.0     | 80.8         |
| Mixtures, mostly grain                    | 12                                          | 2.8     | 83.6         |
| Milk                                      | 13                                          | 2.0     | 85.6         |

<sup>a</sup> Data are for children aged 2 to 18 years ( $n = 7332$ ), Day 1 intakes; <sup>b</sup> Food groups ( $n = 6$ ) contributing at least 1% in descending order: cheese; ready-to-eat cereal; eggs; candy, sugars and sugary foods; pork, ham, bacon; and beef.

**Table S3.** Food/food group sources of vitamin A (retinoic acid equivalents [RAE]) among US children aged 2 to 18 years (from NHANES 2003–2006) <sup>a</sup>.

| Food/Food Group <sup>b</sup>              | Vitamin A (mean = 571 µg RAE) |         |              |
|-------------------------------------------|-------------------------------|---------|--------------|
|                                           | Ranking                       | % Total | Cumulative % |
| Milk                                      | 1                             | 23.3    | 23.3         |
| Ready-to-eat cereal                       | 2                             | 15.1    | 38.4         |
| Cheese                                    | 3                             | 9.4     | 47.8         |
| Carrots, sweet potatoes, winter squash    | 4                             | 7.4     | 55.2         |
| Margarine and butter                      | 5                             | 5.9     | 61.1         |
| Cake, cookies, quick bread, pastry, pie   | 6                             | 4.7     | 65.8         |
| Milk desserts                             | 7                             | 4.5     | 70.3         |
| Milk drinks                               | 8                             | 4.4     | 74.7         |
| Eggs                                      | 9                             | 3.1     | 77.8         |
| Biscuits, corn bread, pancakes, tortillas | 10                            | 3.0     | 80.8         |
| Mixtures, mostly grain                    | 11                            | 2.2     | 83.0         |

<sup>a</sup> Data are for children aged 2 to 18 years ( $n = 7332$ ), Day 1 intakes; <sup>b</sup> Food groups ( $n = 6$ ) contributing at least 1% in descending order: tomatoes, tomato/vegetable juice; fruit; other fats and oils; broccoli, spinach, greens; hot breakfast cereal; and poultry.

**Table S4.** Food/food group sources of vitamin E (alpha-tocopherol [AT]) among US children aged 2 to 18 years (from NHANES 2003–2006) <sup>a</sup>.

| Food/Food Group <sup>b</sup>              | Vitamin E (mean = 5.8 mg AT) |         |              |
|-------------------------------------------|------------------------------|---------|--------------|
|                                           | Ranking                      | % Total | Cumulative % |
| Crackers, popcorn, pretzels, chips        | 1                            | 14.0    | 14.0         |
| Nuts, seeds (including butters, pastes)   | 2                            | 9.9     | 23.9         |
| Tomatoes, tomato/vegetable juice          | 3                            | 9.4     | 33.3         |
| Cake, cookies, quick bread, pastry, pie   | 4                            | 6.4     | 39.7         |
| Salad dressings, mayonnaise               | 5                            | 5.8     | 45.5         |
| Margarine and butter                      | 6                            | 5.1     | 50.6         |
| Other fats and oils                       | 7                            | 4.5     | 55.1         |
| Poultry                                   | 8                            | 4.3     | 59.4         |
| Ready-to-eat cereal                       | 9                            | 3.2     | 62.6         |
| Mixtures, mostly grain                    | 10                           | 2.5     | 65.1         |
| Fruit                                     | 11                           | 2.5     | 67.6         |
| Eggs                                      | 12                           | 2.2     | 69.8         |
| Fruit juice                               | 13                           | 2.2     | 72.0         |
| Beef                                      | 14                           | 2.1     | 74.1         |
| Biscuits, corn bread, pancakes, tortillas | 15                           | 2.1     | 76.2         |
| Condiments and sauces                     | 16                           | 2.1     | 78.3         |
| Potatoes (white)                          | 17                           | 2.0     | 80.3         |

<sup>a</sup> Data are for children aged 2 to 18 years ( $n = 7332$ ), Day 1 intakes; <sup>b</sup> Food groups ( $n = 9$ ) contributing at least 1% in descending order: candy, sugars and sugary foods; milk; yeast breads and rolls; cheese; milk desserts; soup, broth, bouillon; broccoli, spinach, greens; fish and shellfish; and coffee, tea, other, nonalcoholic beverages.

**Table S5.** Food/food group sources of vitamin C among US children aged 2 to 18 years (from NHANES 2003–2006) <sup>a</sup>.

| Food/Food Group <sup>b</sup>     | Vitamin C (mean = 85.7 mg) |         |              |
|----------------------------------|----------------------------|---------|--------------|
|                                  | Ranking                    | % Total | Cumulative % |
| Fruit juice                      | 1                          | 34.7    | 34.7         |
| Fruit drinks and ades            | 2                          | 23.3    | 58.0         |
| Fruit                            | 3                          | 12.4    | 70.4         |
| Ready-to-eat cereal              | 4                          | 4.3     | 74.7         |
| Tomatoes, tomato/vegetable juice | 5                          | 4.3     | 79.0         |
| Other vegetables                 | 6                          | 4.2     | 83.2         |
| Potatoes (white)                 | 7                          | 3.1     | 86.3         |
| Candy, sugars and sugary foods   | 8                          | 3.1     | 89.4         |
| Broccoli, spinach, greens        | 9                          | 2.7     | 92.1         |

<sup>a</sup> Data are for children aged 2 to 18 years ( $n = 7332$ ), Day 1 intakes; <sup>b</sup> Food groups ( $n = 2$ ) contributing at least 1% in descending order: condiments and sauces and crackers, popcorn, pretzels, chips.

**Table S6.** Food/food group sources of thiamin among US children aged 2 to 18 years (from NHANES 2003–2006) <sup>a</sup>.

| Food/Food Group <sup>b</sup>              | Thiamin (mean = 1.6 mg) |         |              |
|-------------------------------------------|-------------------------|---------|--------------|
|                                           | Ranking                 | % Total | Cumulative % |
| Ready-to-eat cereal                       | 1                       | 17.1    | 17.1         |
| Yeast breads and rolls                    | 2                       | 13.5    | 30.6         |
| Milk                                      | 3                       | 7.0     | 37.6         |
| Flour, bran, baking ingredients           | 4                       | 6.6     | 44.2         |
| Biscuits, corn bread, pancakes, tortillas | 5                       | 5.5     | 49.7         |
| Pork, ham, bacon                          | 6                       | 5.5     | 55.2         |
| Cake, cookies, quick bread, pastry, pie   | 7                       | 5.2     | 60.4         |
| Pasta                                     | 8                       | 5.0     | 65.4         |
| Mixtures, mostly grain                    | 9                       | 3.8     | 69.2         |
| Fruit juice                               | 10                      | 3.1     | 72.3         |
| Crackers, popcorn, pretzels, chips        | 11                      | 3.0     | 75.3         |
| Potatoes (white)                          | 12                      | 2.9     | 78.2         |
| Frankfurters, sausages, luncheon meats    | 13                      | 2.5     | 80.7         |

<sup>a</sup> Data are for children aged 2 to 18 years ( $n = 7332$ ), Day 1 intakes; <sup>b</sup> Food groups ( $n = 8$ ) contributing at least 1% in descending order: poultry; rice, cooked grains; fruit; milk drinks; fruit drinks and ades; soup, broth, bouillon; beef; and legumes.

**Table S7.** Food/Food group sources of riboflavin among US children aged 2 to 18 years (from NHANES 2003–2006) <sup>a</sup>.

| Food/Food Group <sup>b</sup>              | Riboflavin (mean = 2.2 mg) |         |              |
|-------------------------------------------|----------------------------|---------|--------------|
|                                           | Ranking                    | % Total | Cumulative % |
| Milk                                      | 1                          | 23.9    | 23.9         |
| Ready-to-eat cereal                       | 2                          | 13.6    | 37.5         |
| Yeast breads and rolls                    | 3                          | 7.2     | 44.7         |
| Cheese                                    | 4                          | 5.3     | 50.0         |
| Cake, cookies, quick bread, pastry, pie   | 5                          | 3.9     | 53.9         |
| Milk drinks                               | 6                          | 3.8     | 57.7         |
| Biscuits, corn bread, pancakes, tortillas | 7                          | 3.5     | 61.2         |
| Flour, bran, baking ingredients           | 8                          | 3.5     | 64.7         |
| Poultry                                   | 9                          | 3.0     | 67.7         |
| Milk desserts                             | 10                         | 2.9     | 70.6         |
| Eggs                                      | 11                         | 2.7     | 73.3         |
| Crackers, popcorn, pretzels, chips        | 12                         | 2.6     | 75.9         |
| Beef                                      | 13                         | 2.6     | 78.5         |
| Mixtures, mostly grain                    | 14                         | 2.4     | 80.9         |

<sup>a</sup> Data are for children aged 2 to 18 years ( $n = 7332$ ), Day 1 intakes; <sup>b</sup> Food groups ( $n = 7$ ) contributing at least 1% in descending order: frankfurters, sausages, luncheon meats; pasta; pork, ham, bacon; fruit drinks and ades; fruit juice; fruit; and condiments and sauces.

**Table S8.** Food/Food group sources of niacin among US children aged 2 to 18 years (from NHANES 2003–2006) <sup>a</sup>.

| Food/Food Group <sup>b</sup>              | Niacin (mean = 21.4 mg) |         |              |
|-------------------------------------------|-------------------------|---------|--------------|
|                                           | Ranking                 | % Total | Cumulative % |
| Ready-to-eat cereal                       | 1                       | 16.2    | 16.2         |
| Poultry                                   | 2                       | 13.8    | 30.0         |
| Yeast breads and rolls                    | 3                       | 10.1    | 40.1         |
| Beef                                      | 4                       | 7.5     | 47.6         |
| Flour, bran, baking ingredients           | 5                       | 4.2     | 51.8         |
| Crackers, popcorn, pretzels, chips        | 6                       | 4.0     | 55.8         |
| Cake, cookies, quick bread, pastry, pie   | 7                       | 4.0     | 59.8         |
| Biscuits, corn bread, pancakes, tortillas | 8                       | 3.9     | 63.7         |
| Frankfurters, sausages, luncheon meats    | 9                       | 3.8     | 67.5         |
| Pork, ham, bacon                          | 10                      | 3.2     | 70.7         |
| Potatoes (white)                          | 11                      | 3.0     | 73.7         |
| Mixtures, mostly grain                    | 12                      | 2.9     | 76.6         |
| Tomatoes, tomato/vegetable juice          | 13                      | 2.7     | 79.3         |
| Nuts, seeds (including butters, pastes)   | 14                      | 2.5     | 81.8         |
| Pasta                                     | 15                      | 2.5     | 84.3         |

<sup>a</sup> Data are for children aged 2 to 18 years ( $n = 7332$ ), Day 1 intakes; <sup>b</sup> Food groups ( $n = 7$ ) contributing at least 1% in descending order: fish and shellfish; fruit drinks and ades; milk; rice, cooked grains; fruit juice; soup, broth, bouillon; and fruit.

**Table S9.** Food/Food group sources of vitamin B6 among US children aged 2 to 18 years (from NHANES 2003–2006) <sup>a</sup>.

| Food/Food Group <sup>b</sup>              | Vitamin B6 (mean = 1.7 mg) |         |              |
|-------------------------------------------|----------------------------|---------|--------------|
|                                           | Ranking                    | % Total | Cumulative % |
| Ready-to-eat cereal                       | 1                          | 22.3    | 22.3         |
| Poultry                                   | 2                          | 7.6     | 29.9         |
| Beef                                      | 3                          | 6.8     | 36.7         |
| Milk                                      | 4                          | 6.1     | 42.8         |
| Potatoes (white)                          | 5                          | 6.1     | 48.9         |
| Fruit                                     | 6                          | 4.3     | 53.2         |
| Fruit juice                               | 7                          | 4.2     | 57.4         |
| Crackers, popcorn, pretzels, chips        | 8                          | 3.6     | 61.0         |
| Biscuits, corn bread, pancakes, tortillas | 9                          | 3.2     | 64.2         |
| Pork, ham, bacon                          | 10                         | 2.8     | 67.0         |
| Cake, cookies, quick bread, pastry, pie   | 11                         | 2.7     | 69.7         |
| Frankfurters, sausages, luncheon meats    | 12                         | 2.6     | 72.3         |
| Tomatoes, tomato/vegetable juice          | 13                         | 2.5     | 74.8         |
| Fruit drinks and ades                     | 14                         | 2.3     | 77.1         |
| Yeast breads and rolls                    | 15                         | 2.3     | 79.4         |

<sup>a</sup> Data are for children aged 2 to 18 years ( $n = 7332$ ), Day 1 intakes; <sup>b</sup> Food groups ( $n = 8$ ) contributing at least 1% in descending order: other vegetables; nuts, seeds (including butters, pastes); milk drinks; mixtures, mostly grain; cheese; coffee, tea, other, nonalcoholic beverages; eggs; and condiments and sauces.

**Table S10.** Food/Food group sources of folate among US children aged 2 to 18 years (from NHANES 2003–2006) <sup>a</sup>.

| Food/Food Group <sup>b</sup>              | Folate (mean = 387 µg) |         |              |
|-------------------------------------------|------------------------|---------|--------------|
|                                           | Ranking                | % Total | Cumulative % |
| Ready-to-eat cereal                       | 1                      | 25.7    | 25.7         |
| Yeast breads and rolls                    | 2                      | 14.0    | 39.7         |
| Flour, bran, baking ingredients           | 3                      | 6.0     | 45.7         |
| Pasta                                     | 4                      | 5.5     | 51.2         |
| Cake, cookies, quick bread, pastry, pie   | 5                      | 5.1     | 56.3         |
| Biscuits, corn bread, pancakes, tortillas | 6                      | 4.6     | 60.9         |
| Crackers, popcorn, pretzels, chips        | 7                      | 4.0     | 64.9         |
| Mixtures, mostly grain                    | 8                      | 3.8     | 68.7         |
| Milk                                      | 9                      | 3.7     | 72.4         |
| Fruit juice                               | 10                     | 3.4     | 75.8         |
| Rice, cooked grains                       | 11                     | 2.5     | 78.3         |
| Legumes                                   | 12                     | 2.1     | 80.4         |

<sup>a</sup> Data are for children aged 2 to 18 years ( $n = 7332$ ), Day 1 intakes; <sup>b</sup> Food groups ( $n = 7$ ) contributing at least 1% in descending order: fruit; potatoes (white); nuts, seeds (including butters, pastes); eggs; other vegetables; broccoli, spinach, greens; and tomatoes and tomato/vegetable juice.

**Table S11.** Food/food group sources of folate (dietary folate equivalents; DFE) among US children aged 2 to 18 years (from NHANES 2003–2006) <sup>a</sup>.

| Food/Food Group <sup>b</sup>              | Folate (mean = 548 µg DFE) |         |              |
|-------------------------------------------|----------------------------|---------|--------------|
|                                           | Ranking                    | % Total | Cumulative % |
| Ready-to-eat cereal                       | 1                          | 30.3    | 30.3         |
| Yeast breads and rolls                    | 2                          | 14.8    | 45.1         |
| Flour, bran, baking ingredients           | 3                          | 6.5     | 51.6         |
| Pasta                                     | 4                          | 6.3     | 57.9         |
| Cake, cookies, quick bread, pastry, pie   | 5                          | 5.4     | 63.3         |
| Biscuits, corn bread, pancakes, tortillas | 6                          | 5.0     | 68.3         |
| Mixtures, mostly grain                    | 7                          | 3.9     | 72.2         |
| Crackers, popcorn, pretzels, chips        | 8                          | 3.7     | 75.9         |
| Rice, cooked grains                       | 9                          | 3.0     | 78.9         |
| Milk                                      | 10                         | 2.6     | 81.5         |
| Fruit juice                               | 11                         | 2.4     | 83.9         |

<sup>a</sup> Data are for children aged 2 to 18 years ( $n = 7332$ ), Day 1 intakes; <sup>b</sup> Food groups ( $n = 3$ ) contributing at least 1% in descending order: legumes; fruit; and potatoes (white).

**Table S12.** Food/Food group sources of vitamin B12 among US children aged 2 to 18 years (from NHANES 2003–2006) <sup>a</sup>.

| Food/Food Group <sup>b</sup>           | Vitamin B12 (mean = 5.3 µg) |         |              |
|----------------------------------------|-----------------------------|---------|--------------|
|                                        | Ranking                     | % Total | Cumulative % |
| Milk                                   | 1                           | 24.7    | 24.7         |
| Ready-to-eat cereal                    | 2                           | 18.5    | 43.2         |
| Beef                                   | 3                           | 14.7    | 57.9         |
| Cheese                                 | 4                           | 6.4     | 64.3         |
| Fish and shellfish                     | 5                           | 5.2     | 69.5         |
| Frankfurters, sausages, luncheon meats | 6                           | 4.7     | 74.2         |
| Mixtures, mostly grain                 | 7                           | 3.2     | 77.4         |
| Milk drinks                            | 8                           | 2.9     | 80.3         |
| Eggs                                   | 9                           | 2.7     | 83.0         |
| Fruit drinks and ades                  | 10                          | 2.3     | 85.3         |
| Poultry                                | 11                          | 2.2     | 87.5         |
| Milk desserts                          | 12                          | 2.1     | 89.6         |

<sup>a</sup> Data are for children aged 2 to 18 years ( $n = 7332$ ), Day 1 intakes; <sup>b</sup> Food groups ( $n = 5$ ) contributing at least 1% in descending order: pork, ham, bacon; biscuits, corn bread, pancakes, tortillas; cake, cookies, quick bread, pastry, pie; yogurt and organ meats.

**Table S13.** Food/Food group sources of phosphorus among US children aged 2 to 18 years (from NHANES 2003–2006) <sup>a</sup>.

| Food/Food Group <sup>b</sup>              | Phosphorus (mean = 1265 mg) |         |              |
|-------------------------------------------|-----------------------------|---------|--------------|
|                                           | Ranking                     | % Total | Cumulative % |
| Milk                                      | 1                           | 21.3    | 21.3         |
| Cheese                                    | 2                           | 11.8    | 33.1         |
| Poultry                                   | 3                           | 6.6     | 39.7         |
| Beef                                      | 4                           | 5.0     | 44.7         |
| Biscuits, corn bread, pancakes, tortillas | 5                           | 4.6     | 49.3         |
| Yeast breads and rolls                    | 6                           | 3.9     | 53.2         |
| Crackers, popcorn, pretzels, chips        | 7                           | 3.4     | 56.6         |
| Cake, cookies, quick bread, pastry, pie   | 8                           | 3.3     | 59.9         |
| Milk drinks                               | 9                           | 3.3     | 63.2         |
| Mixtures, mostly grain                    | 10                          | 3.1     | 66.3         |
| Frankfurters, sausages, luncheon meats    | 11                          | 2.8     | 69.1         |
| Ready-to-eat cereal                       | 12                          | 2.6     | 71.7         |
| Pork, ham, bacon                          | 13                          | 2.6     | 74.3         |
| Milk desserts                             | 14                          | 2.5     | 76.8         |
| Potatoes (white)                          | 15                          | 2.4     | 79.2         |

<sup>a</sup> Data are for children aged 2 to 18 years ( $n = 7332$ ), Day 1 intakes; <sup>b</sup> Food groups ( $n = 10$ ) contributing at least 1% in descending order: eggs; nuts, seeds (including butters, pastes); flour, bran, baking ingredients; pasta; soft drinks, soda (including diet); fish and shellfish; legumes; candy, sugars and sugary foods; fruit juice; and yogurt.

**Table S14.** Food/Food group sources of magnesium among US children aged 2 to 18 years (from NHANES 2003–2006) <sup>a</sup>.

| Food/Food Group <sup>b</sup>               | Magnesium (mean = 231 mg) |         |              |
|--------------------------------------------|---------------------------|---------|--------------|
|                                            | Ranking                   | % Total | Cumulative % |
| Milk                                       | 1                         | 13.3    | 13.3         |
| Crackers, popcorn, pretzels, chips         | 2                         | 7.3     | 20.6         |
| Yeast breads and rolls                     | 3                         | 5.9     | 26.5         |
| Ready-to-eat cereal                        | 4                         | 4.2     | 30.7         |
| Cake, cookies, quick bread, pastry, pie    | 5                         | 4.2     | 34.9         |
| Fruit juice                                | 6                         | 4.1     | 39.0         |
| Poultry                                    | 7                         | 4.1     | 43.1         |
| Potatoes (white)                           | 8                         | 3.9     | 47.0         |
| Nuts, seeds (including butters, pastes)    | 9                         | 3.8     | 50.8         |
| Cheese                                     | 10                        | 3.5     | 54.3         |
| Fruit                                      | 11                        | 3.4     | 57.7         |
| Biscuits, corn bread, pancakes, tortillas  | 12                        | 3.0     | 60.7         |
| Beef                                       | 13                        | 2.9     | 63.6         |
| Milk drinks                                | 14                        | 2.8     | 66.4         |
| Coffee, tea, other, nonalcoholic beverages | 15                        | 2.7     | 69.1         |
| Tomatoes, tomato/vegetable juice           | 16                        | 2.7     | 71.8         |
| Pasta                                      | 17                        | 2.5     | 74.3         |
| Candy, sugars and sugary foods             | 18                        | 2.3     | 76.6         |
| Mixtures, mostly grain                     | 19                        | 2.2     | 78.8         |
| Milk desserts                              | 20                        | 2.2     | 81.0         |
| Legumes                                    | 21                        | 2.1     | 83.1         |

<sup>a</sup> Data are for children aged 2 to 18 years ( $n = 7332$ ), Day 1 intakes; <sup>b</sup> Food groups ( $n = 8$ ) contributing at least 1% in descending order: flour, bran, baking ingredients; frankfurters, sausages, luncheon meats; fruit drinks and ades; pork, ham, bacon; condiments and sauces; other vegetables; fish and shellfish; and rice, cooked grains.

**Table S15.** Food/Food group sources of iron among US children aged 2 to 18 years (from NHANES 2003–2006) <sup>a</sup>.

| Food/Food Group <sup>b</sup>              | Iron (mean = 15.2 mg) |         |              |
|-------------------------------------------|-----------------------|---------|--------------|
|                                           | Ranking               | % Total | Cumulative % |
| Ready-to-eat cereal                       | 1                     | 22.9    | 22.9         |
| Yeast breads and rolls                    | 2                     | 11.9    | 34.8         |
| Cakes, cookies, quick bread, pastry, pie  | 3                     | 6.3     | 41.1         |
| Flour, bran, baking ingredients           | 4                     | 5.2     | 46.3         |
| Beef                                      | 5                     | 5.1     | 51.4         |
| Biscuits, corn bread, pancakes, tortillas | 6                     | 4.9     | 56.3         |
| Crackers, popcorn, pretzels, chips        | 7                     | 4.3     | 60.6         |
| Mixtures, mostly grain                    | 8                     | 3.1     | 63.7         |
| Fruit juice                               | 9                     | 2.9     | 66.6         |
| Poultry                                   | 10                    | 2.7     | 69.3         |
| Pasta                                     | 11                    | 2.7     | 72.0         |
| Tomatoes, tomato/vegetable juice          | 12                    | 2.4     | 74.4         |
| Frankfurters, sausages, luncheon meats    | 13                    | 2.0     | 76.4         |
| Soft drinks, soda (includes diet)         | 14                    | 2.0     | 78.4         |

<sup>a</sup> Data are for children aged 2 to 18 years ( $n = 7332$ ), Day 1 intakes; <sup>b</sup> Food groups ( $n = 9$ ) contributing at least 1% in descending order: potatoes (white); legumes; eggs; rice, cooked grains; candy, sugars and sugary foods; hot breakfast cereal; soup, broth, bouillon; fruit; and milk drinks.

**Table S16.** Food/Food group sources of zinc among US children aged 2 to 18 years (from NHANES 2003–2006) <sup>a</sup>.

| Food/Food Group <sup>b</sup>            | Zinc (mean = 11.2 mg) |         |              |
|-----------------------------------------|-----------------------|---------|--------------|
|                                         | Ranking               | % Total | Cumulative % |
| Beef                                    | 1                     | 16.6    | 16.6         |
| Ready-to-eat cereal                     | 2                     | 14.3    | 30.9         |
| Milk                                    | 3                     | 10.8    | 41.7         |
| Cheese                                  | 4                     | 8.0     | 49.7         |
| Poultry                                 | 5                     | 5.4     | 55.1         |
| Frankfurters, sausages, luncheon meats  | 6                     | 4.4     | 59.5         |
| Yeast breads and rolls                  | 7                     | 4.0     | 63.5         |
| Crackers, popcorn, pretzels, chips      | 8                     | 3.7     | 67.2         |
| Mixture, mainly grain                   | 9                     | 3.1     | 70.3         |
| Pork, ham, bacon                        | 10                    | 2.7     | 73.0         |
| Cake, cookies, quick bread, pastry, pie | 11                    | 2.3     | 75.3         |

<sup>a</sup> Data are for children aged 2 to 18 years ( $n = 7332$ ), Day 1 intakes; <sup>b</sup> Food groups ( $n = 12$ ) contributing at least 1% in descending order: milk drinks; milk desserts; legumes; nuts, seeds (including butters, pastes); candy, sugar and sugary foods; pasta; biscuits, corn bread, pancakes, tortillas; potatoes (white); flour, bran, baking ingredients; eggs; fish and shellfish; and tomatoes, tomato/vegetable juice.
